# Supplementary material for: Historical roots of entrepreneurship in different regional contexts—the case of Poland
Source: Springer Nature journal article supplement (doi:10.1007/s11187-021-00535-z), 2021-07-24
Supplement: MOESM1 [file 19389590]

# Supplementary Information (SI) (Electronic Supplementary Material)

## Appendix A: Basic characteristics of the variables


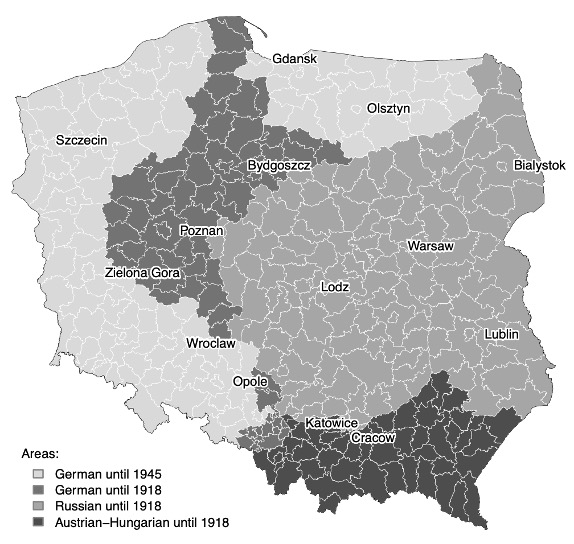


**Fig. A.1** Affiliation of current counties of Poland to Prussia, Russia and Austria-Hungary between 1815 and 1945

**Table A.1** Summary of the main variables of interest, the two groups of control variables, and dummy variables with definitions and sources

| Variable | Definition | Source |
| --- | --- | --- |
| *Main variables of interest* | | |
| Current start-up rate | The share of new private businesses of the years 2003–2019 (without people running individual farms in agriculture) in the total workforce (employed and unemployed) in the economy, including agriculture in 2011 | Local Data Bank of the Central Statistical Office of Poland for numerator; National Population Census from 2011 for denominator |
| Historical self-employment rate | The share of self-employed (both employing and not employing additional workers but without helping family members) in the economic active regional population 1921 (for Polish part) and 1925 (for former German part). Homeworkers and self-employed in agriculture, forestry, fishery, gas, water, electricity, and public services are not considered in the number of self-employed. | Statistik des Deutschen Reichs (1927) for the German part; (GUS 1927) for the Polish part |
| Historical self-employment in knowledge-intensive manufacturing industries | Number of self-employed (both employing and not employing additional workers but without helping family members) in knowledge-intensive manufacturing industriesa) in the 1920s over economically active persons in the region. | Statistik des Deutschen Reichs (1927) for the German part; (GUS 1927) for the Polish part |
| *Control variables for the pre-War period of the 1920s* | | |
| Workforce density | Number of economically active population per square kilometer | As historical self-employment rate |
| Distance to nearest university | Distance measured in km to the nearest county with the state or private university that existed in the 1920s (distance to the same county is equal to zero) | For Germany: Deutsche Hochschulstatistik (1929); for Poland GUS (1923, p. 292). |
| Distance to nearest coalfield | Distance measured in km to the nearest county with a coalfield (distance to the same county is equal to zero) | Atlas Chatel & Dollfus (1931) |
| Share of manufacturing | The share of people working in manufacturing industries in the total number of economically active persons (including agriculture) in 1921 (for Poland) and in 1925 (for Germany) | As historical self-employment rate |
| *Control variables for the most recent years* | | |
| Share of indigenous population | Population of the year 1950 that lived in the same NUTS2 region in 1939 over total population of 1950 | Special issues of census from 3rd of December 1950 concerning place of residence in August 1939 (GUS 1955*)* |
| Share of migrants Russia | Number of repatriates from the formerly Polish area that became Russian after World War II (mostly from *Kresy*) over total population of year 1950 | Special issues of census from 3rd of December 1950 concerning place of residence in August 1939 (GUS 1955) |
| Share of migrants from central Poland | Number of migrants from regions that were Polish before and after 1945 over total population of year 1950 | Special issues of census from 3rd of December 1950 concerning place of residence in August 1939 (GUS 1955) |
| Share of migrants other | Number of repatriates and re-emigrants from other countries (especially Germany and France) in the total population of 1950 | Special issues of census from 3rd of December 1950 concerning place of residence in August 1939 (GUS 1955) |
| Distance to current German border | Distance measured in km to the nearest county with the current German border (distance to the same county is equal to zero) | Current maps |
| *Variables for regional political heritage* | | |
| German until 1945 | Value of 1 if county belonged to Germany until 1945; 0 otherwise | Historical maps |
| German until 1918 | Value of 1 if county belonged to Prussia until 1918; 0 otherwise | Historical maps |
| Austrian until 1918 | Value of 1 if county belonged to Austria-Hungary until 1918; 0 otherwise | Historical maps |
| Russian until 1918 | Value of 1 if county belonged to Russia until 1918; 0 otherwise | Historical maps |
| Note: a) Industries classified as knowledge-intensive are as follow: manufacture of machinery and electro-technical equipment; manufacture of basic precious metals, watches and clocks and precision instruments; manufacture of chemicals and chemical products. | | |

**Table A.2** Descriptive statistics for pre-1945 German and pre-1945 Polish areas

| Variable | Polish until 1945 | | | | | German until 1945 | | | | |
| --- | --- | --- | --- | --- | --- | --- | --- | --- | --- | --- |
| N | Mean | Standard Deviation | Minimum | Maximum | N | Mean | Standard Deviation | Minimum | Maximum |
| Current start-up rate in 2003-2019 | 244 | 1.57 | 0.385 | 0.93 | 4.362 | 113 | 1.89 | 0.435 | 1.031 | 3.29 |
| Current start-up rate in 2012-2019 | 244 | 1.668 | 0.409 | 1.004 | 4.205 | 113 | 1.951 | 0.485 | 1.041 | 3.834 |
| Self-employment rate in knowledge-intensive manufacturing in the 1920s | 228 | 0.063 | 0.064 | 0.006 | 0.466 | 100 | 0.172 | 0.085 | 0.034 | 0.468 |
| Self-employment rate in other than knowledge-intensive manufacturing industries in the 1920s (excluding agriculture) | 228 | 6.134 | 2.802 | 1.698 | 20.597 | 100 | 6.682 | 1.889 | 3.948 | 12.240 |
| Self-employment rate in non-knowledge-intensive manufacturing in the 1920s | 228 | 3.181 | 1.176 | 0.824 | 8.691 | 100 | 3.216 | 0.635 | 2.053 | 4.784 |
| Workforce density | 228 | 61.379 | 102.161 | 9.179 | 907.787 | 100 | 70.007 | 124.929 | 4.338 | 1001.85 |
| Share of manufacturing in the 1920s | 228 | 8.465 | 6.636 | 1.824 | 53.487 | 100 | 19.886 | 11.17 | 4.762 | 52.249 |
| Distance to nearest university (km) | 244 | 80.718 | 54.781 | 0 | 273.749 | 113 | 156.734 | 55.288 | 19.232 | 257.023 |
| Distance to nearest coalfield (km) | 244 | 144.359 | 103.54 | 0 | 469.801 | 113 | 109.128 | 116.838 | 0 | 422.498 |
| Share of indigenous population | 244 | 89.954 | 6.386 | 52.658 | 96.04 | 113 | 16.614 | 18.75 | 2.715 | 65.395 |
| Share of migrants from *Kresy* | 244 | 3.142 | 1.961 | 1.008 | 12.831 | 113 | 27.231 | 8.51 | 11.351 | 41.125 |
| Share of migrants from other countries | 244 | 0.325 | 0.296 | 0.067 | 2.132 | 113 | 2.4 | 1.629 | 0.359 | 4.964 |

**Table A.3** Correlation matrix between main variables of interest and control variables

|  |  | 2 | 3 | 4 | 5 | 6 | 7 | 8 | 9 | 10 | 11 | 12 |
| --- | --- | --- | --- | --- | --- | --- | --- | --- | --- | --- | --- | --- |
| 1 | Current start-up rate in 2003-2019 | 0.976*** | 0.557*** | 0.411*** | 0.318*** | 0.313*** | 0.488*** | 0.308*** | –0.443*** | –0.457*** | 0.366*** | 0.328*** |
| 2 | Current start-up rate in 2012-2019 |  | 0.474*** | 0.346*** | 0.251*** | 0.288*** | 0.419*** | 0.272*** | –0.392*** | –0.402*** | 0.317*** | 0.295*** |
| 3 | Self-employment rates in knowledge-intensive manufacturing in the 1920s |  |  | 0.746*** | 0.609*** | 0.569*** | 0.826*** | 0.255*** | –0.518*** | –0.615*** | 0.618*** | 0.606*** |
| 4 | Self-employment rates in other than knowledge-intensive manufacturing industries in the 1920s (excluding agriculture) |  |  |  | 0.924*** | 0.629*** | 0.642*** | –0.101* | –0.209*** | –0.143*** | 0.128** | 0.176*** |
| 5 | Self-employment rates in non-knowledge-intensive manufacturing in the 1920s |  |  |  |  | 0.437*** | 0.547*** | –0.125** | –0.261*** | –0.072 | 0.054 | 0.125** |
| 6 | Workforce density |  |  |  |  |  | 0.514*** | –0.114** | –0.040 | –0.051 | 0.044 | 0.133** |
| 7 | Share of manufacturing in the 1920s |  |  |  |  |  |  | 0.146*** | –0.538*** | –0.562*** | 0.597*** | 0.625*** |
| 8 | Distance to nearest university |  |  |  |  |  |  |  | –0.140*** | –0.599*** | 0.490*** | 0.276*** |
| 9 | Distance to nearest coalfield |  |  |  |  |  |  |  |  | 0.617*** | –0.652*** | –0.664*** |
| 10 | Share of indigenous population |  |  |  |  |  |  |  |  |  | –0.940*** | –0.763*** |
| 11 | Share of migrants from *Kresy* |  |  |  |  |  |  |  |  |  |  | 0.843*** |
| 12 | Share of migrants from other countries |  |  |  |  |  |  |  |  |  |  |  |

## Appendix B: Full tables and additional analyses for main findings


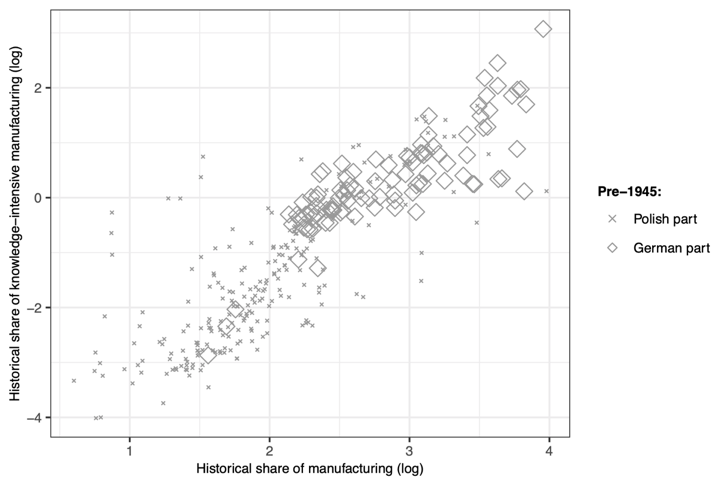


**Fig. B.1** Scatter plot between the historical share of manufacturing and the historical share of knowledge-intensive manufacturing in total workforce


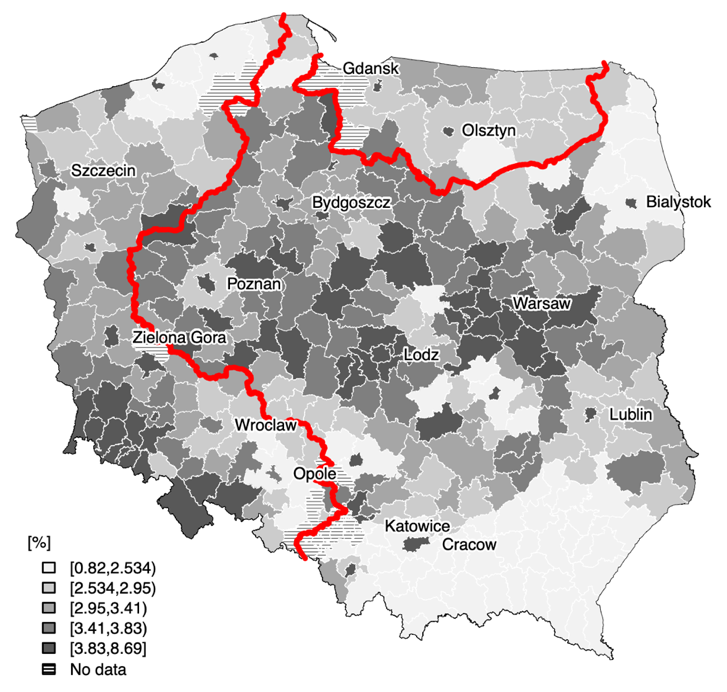


**Fig. B.2** Self-employment in non-knowledge-intensive manufacturing industries per total workforce in the 1920s

Note: the bold line represents the border between the pre-1945-German and Polish territory.

| (a) | (c) |
| --- | --- |
|  |  |
| (b) |  |
|  |  |

**Fig. B.3** Scatter plot between the average start-up rate (log) in 2003–2019 and historical self-employment rates in knowledge-intensive manufacturing industries (a) other than knowledge-intensive industries excluding agriculture (b) non-knowledge-intensive manufacturing industries (c) per total workforce

**Table B.1** *(full Table 1)* Differences in start-up rates across Polish counties 2003–2019: The role of historical entrepreneurship in knowledge-intensive industries

|  | I | II | III | IV | V | VI |
| --- | --- | --- | --- | --- | --- | --- |
| Historical self-employment in knowledge-intensive industries | 0.169*** | 0.114*** | 0.095*** | 0.114*** | 0.109*** | 0.126*** |
| (0.013) | (0.028) | (0.027) | (0.028) | (0.027) | (0.031) |
| Area belonged to Germany until 1945  (yes=1) |  | –0.065* | –0.204*** | –1.127*** | –4.524*** | –4.914*** |
|  | (0.036) | (0.057) | (0.313) | (0.895) | (0.949) |
| Area belonged to Russia until 1918  (yes=1) |  | –0.128*** | –0.143*** | –0.124*** | –0.084** | –0.078** |
|  | (0.032) | (0.038) | (0.033) | (0.039) | (0.040) |
| Area belonged to Austro-Hungary until 1918 (yes=1) |  | 0.102** | 0.066 | 0.095* | 0.137*** | 0.146*** |
|  | (0.051) | (0.050) | (0.056) | (0.053) | (0.053) |
| Workforce density |  | –0.026 | –0.016 | –0.041 | –0.023 | –0.028 |
|  | (0.020) | (0.020) | (0.027) | (0.025) | (0.025) |
| Share of employed in manufacturing |  | 0.130*** | 0.099*** | 0.119*** | 0.068* | 0.054 |
|  | (0.035) | (0.034) | (0.038) | (0.038) | (0.039) |
| Distance to the nearest university |  | –0.033** | –0.045*** | –0.046*** | –0.050*** | –0.051*** |
|  | (0.014) | (0.014) | (0.016) | (0.015) | (0.015) |
| Distance to the nearest coal field |  | 0.037*** | 0.044*** | 0.029*** | 0.039*** | 0.038*** |
|  | (0.008) | (0.008) | (0.011) | (0.011) | (0.011) |
| Share of indigenous people |  |  | –0.095*** |  | –0.994*** | –1.000*** |
|  |  | (0.021) |  | (0.161) | (0.161) |
| Share of immigrants from Russia |  |  | –0.048** |  | –0.083*** | –0.086*** |
|  |  | (0.022) |  | (0.024) | (0.024) |
| Share of immigrants from other countries |  |  | 0.036* |  | 0.038* | 0.040* |
|  |  | (0.019) |  | (0.022) | (0.022) |
| Historical self-employment in knowledge-intensive industries x area belonged to Germany until 1945 (yes=1) |  |  |  |  |  | –0.083 |
|  |  |  |  |  | (0.047) |
| Workforce density x area belonged to Germany until 1945 (yes=1) |  |  |  | 0.059 | 0.067 | (0.068) |
|  |  |  | (0.044) | (0.043) | 0.088* |
| Share of employed in manufacturing x area belonged to Germany until 1945 (yes=1) |  |  |  | –0.062 | –0.080 | –0.050 |
|  |  |  | (0.073) | (0.076) | (0.080) |
| Distance to the nearest university x area belonged to Germany until 1945 (yes=1) |  |  |  | 0.213*** | 0.117* | 0.118* |
|  |  |  | (0.064) | (0.064) | (0.064) |
| Distance to the nearest coal field x area belonged to Germany until 1945 (yes=1) |  |  |  | –0.009 | –0.015 | –0.012 |
|  |  |  | (0.018) | (0.017) | (0.018) |
| Share of indigenous people x area belonged to Germany until 1945 (yes=1) |  |  |  |  | 0.894*** | 0.891*** |
|  |  |  |  | (0.163) | (0.163) |
| Share of immigrants from Russia x area belonged to Germany until 1945 (yes=1) |  |  |  |  | –0.036 | –0.023 |
|  |  |  |  | (0.106) | (0.106) |
| Share of immigrants from other countries x area belonged to Germany until 1945 (yes=1) |  |  |  |  | –0.015 | –0.014 |
|  |  |  |  | (0.046) | (0.045) |
| Constant | 0.935*** | 0.638*** | 1.168*** | 0.809*** | 5.378*** | 5.507*** |
| (0.036) | (0.175) | (0.193) | (0.209) | (0.767) | (0.774) |
| Number of observations | 328 | 328 | 328 | 328 | 328 | 328 |
| R2 | 0.346 | 0.442 | 0.502 | 0.466 | 0.566 | 0.568 |
| Adjusted R2 | 0.344 | 0.428 | 0.485 | 0.445 | 0.540 | 0.541 |
| *Notes:* The dependent variable is the average start-up rate (log) in 2003–2019. Number of observations is N=328. Pre-war controls are workforce density, the share in employed in the manufacturing, the distance to universities and the distance to coal mines. Migration controls following WWII include the share of indigenous people, immigrants from Russia, and immigrants from other countries. In all models, we include a dummy variable that controls whether a region was part of Austria before 1918 and a dummy variable that controls whether a region was part of Russia before 1918 (reference group: regions that belonged to Prussia before 1918). All independent variables except dummies are in logs. Constant is not shown for brevity. Robust standard errors are shown in parentheses. ***Statistically significant at the 1% level; **statistically significant at the 5% level, *statistically significant at the 10% level. | | | | | | |

**Table B.2** *(full Table 2)*: Differences in start-up rates across Polish counties 2003–2019: The role of historical entrepreneurship in other than knowledge-intensive industries (excluding self-employment in agriculture)

|  | I | II | III | IV | V | VI |
| --- | --- | --- | --- | --- | --- | --- |
| Historical self-employment in other than knowledge-intensive industries | 0.249*** | 0.074 | 0.057 | 0.059 | 0.033 | –0.063 |
| (0.033) | (0.058) | (0.056) | (0.059) | (0.057) | (0.067) |
| Area belonged to Germany until 1945  (yes=1) |  | –0.020 | –0.194*** | –1.016*** | –4.126*** | –4.357*** |
|  | (0.038) | (0.060) | (0.320) | (0.911) | (0.907) |
| Area belonged to Russia until 1918  (yes=1) |  | –0.167*** | –0.175*** | –0.164*** | –0.124*** | –0.126*** |
|  | (0.032) | (0.038) | (0.032) | (0.039) | (0.038) |
| Area belonged to Austro-Hungary until 1918 (yes=1) |  | 0.079 | 0.044 | 0.064 | 0.097* | 0.060 |
|  | (0.055) | (0.054) | (0.060) | (0.057) | (0.058) |
| Workforce density |  | –0.014 | –0.005 | –0.020 | 0.001 | 0.019 |
|  | (0.021) | (0.020) | (0.029) | (0.027) | (0.027) |
| Share of employed in manufacturing |  | 0.185*** | 0.144*** | 0.183*** | 0.143*** | 0.181*** |
|  | (0.035) | (0.035) | (0.039) | (0.038) | (0.041) |
| Distance to the nearest university |  | –0.030** | –0.044*** | –0.041** | –0.044*** | –0.044*** |
|  | (0.015) | (0.014) | (0.016) | (0.015) | (0.015) |
| Distance to the nearest coal field |  | 0.040*** | 0.046*** | 0.034*** | 0.040*** | 0.041*** |
|  | (0.008) | (0.009) | (0.011) | (0.011) | (0.011) |
| Share of indigenous people |  |  |  | –0.105*** |  | –0.951*** |
|  |  | (0.021) |  | (0.165) | (0.163) |
| Share of immigrants from Russia |  |  | –0.043* |  | –0.069*** | –0.064*** |
|  |  | (0.022) |  | (0.025) | (0.025) |
| Share of immigrants from other countries |  |  | 0.033* |  | 0.025 | 0.015 |
|  |  | (0.020) |  | (0.023) | (0.023) |
| Historical self-employment in other than knowledge-intensive industries x area belonged to Germany until 1945 (yes=1) |  |  |  |  |  | 0.319*** |
|  |  |  |  |  | (0.123) |
| Workforce density x area belonged to Germany until 1945 (yes=1) |  |  |  | 0.050 | 0.065 | 0.019 |
|  |  |  | (0.045) | (0.045) | (0.048) |
| Share of employed in manufacturing x area belonged to Germany until 1945 (yes=1) |  |  |  | –0.081 | –0.133* | –0.210** |
|  |  |  | (0.074) | (0.078) | (0.082) |
| Distance to the nearest university x area belonged to Germany until 1945 (yes=1) |  |  |  | 0.218*** | 0.111* | 0.108* |
|  |  |  | (0.065) | (0.066) | (0.065) |
| Distance to the nearest coal field x area belonged to Germany until 1945 (yes=1) |  |  |  | –0.011 | –0.012 | –0.018 |
|  |  |  | (0.018) | (0.018) | (0.018) |
| Share of indigenous people x area belonged to Germany until 1945 (yes=1) |  |  |  |  | 0.838*** | 0.861*** |
|  |  |  |  | (0.167) | (0.166) |
| Share of immigrants from Russia x area belonged to Germany until 1945 (yes=1) |  |  |  |  | –0.034 | –0.045 |
|  |  |  |  | (0.108) | (0.108) |
| Share of immigrants from other countries x area belonged to Germany until 1945 (yes=1) |  |  |  |  | 0.004 | 0.017 |
|  |  |  |  | (0.047) | (0.046) |
| Constant | 0.040 | 0.015 | 0.698*** | 0.144 | 4.524*** | 4.577*** |
| (0.060) | (0.113) | (0.161) | (0.139) | (0.757) | (0.750) |
| Number of observations | 328 | 328 | 328 | 328 | 328 | 328 |
| R2 | 0.146 | 0.416 | 0.484 | 0.439 | 0.544 | 0.553 |
| Adjusted R2 | 0.143 | 0.401 | 0.466 | 0.418 | 0.517 | 0.526 |
| *Notes:* As in Table B.1. | | | | | | |

**Table B.3** *(full Table 3)*: Differences in start-up rates across Polish counties 2003–2019: The role of historical entrepreneurship in non-knowledge-intensive manufacturing industries

|  | I | II | III | IV | V | VI |
| --- | --- | --- | --- | --- | --- | --- |
| Historical self-employment in non-knowledge-intensive manufacturing industries | 0.198*** | –0.026 | –0.033 | –0.056 | –0.074 | –0.124 |
| (0.036) | (0.065) | (0.062) | (0.068) | (0.064) | (0.078) |
| Area belonged to Germany until 1945  (yes=1) |  | –0.040 | –0.219*** | –1.013*** | –4.193*** | –4.191*** |
|  | (0.042) | (0.061) | (0.320) | (0.912) | (0.912) |
| Area belonged to Russia until 1918  (yes=1) |  | –0.164*** | –0.177*** | –0.163*** | –0.132*** | –0.137*** |
|  | (0.032) | (0.038) | (0.032) | (0.039) | (0.039) |
| Area belonged to Austro-Hungary until 1918 (yes=1) |  | 0.042 | 0.007 | 0.013 | 0.043 | 0.016 |
|  | (0.060) | (0.059) | (0.066) | (0.063) | (0.067) |
| Workforce density |  | –0.005 | 0.003 | –0.004 | 0.015 | 0.020 |
|  | (0.020) | (0.019) | (0.027) | (0.025) | (0.026) |
| Share of employed in manufacturing |  | 0.221*** | 0.176*** | 0.225*** | 0.184*** | 0.204*** |
|  | (0.037) | (0.036) | (0.041) | (0.040) | (0.043) |
| Distance to the nearest university |  | –0.033** | –0.047*** | –0.041** | –0.043*** | –0.043*** |
|  | (0.015) | (0.014) | (0.016) | (0.015) | (0.015) |
| Distance to the nearest coal field |  | 0.044*** | 0.049*** | 0.038*** | 0.041*** | 0.042*** |
|  | (0.008) | (0.009) | (0.011) | (0.011) | (0.011) |
| Share of indigenous people |  |  | –0.110*** |  | –0.967*** | –0.976*** |
|  |  | (0.021) |  | (0.165) | (0.165) |
| Share of immigrants from Russia |  |  | –0.041* |  | –0.068*** | –0.068*** |
|  |  | (0.022) |  | (0.025) | (0.025) |
| Share of immigrants from other countries |  |  | 0.027 |  | 0.014 | 0.010 |
|  |  | (0.020) |  | (0.023) | (0.023) |
| Historical self-employment in non-knowledge-intensive manufacturing industries x area belonged to Germany until 1945 (yes=1) |  |  |  |  |  | 0.159 |
|  |  |  |  |  | (0.139) |
| Workforce density x area belonged to Germany until 1945 (yes=1) |  |  |  | 0.039 | 0.054 | 0.051 |
|  |  |  | (0.046) | (0.045) | (0.045) |
| Share of employed in manufacturing x area belonged to Germany until 1945 (yes=1) |  |  |  | –0.092 | –0.151* | –0.197** |
|  |  |  | (0.074) | (0.077) | (0.086) |
| Distance to the nearest university x area belonged to Germany until 1945 (yes=1) |  |  |  | 0.227*** | 0.118* | 0.107 |
|  |  |  | (0.065) | (0.066) | (0.067) |
| Distance to the nearest coal field x area belonged to Germany until 1945 (yes=1) |  |  |  | –0.014 | –0.012 | –0.014 |
|  |  |  | (0.018) | (0.018) | (0.018) |
| Share of indigenous people x area belonged to Germany until 1945 (yes=1) |  |  |  |  | 0.853*** | 0.861*** |
|  |  |  |  | (0.167) | (0.167) |
| Share of immigrants from Russia x area belonged to Germany until 1945 (yes=1) |  |  |  |  | –0.029 | –0.037 |
|  |  |  |  | (0.108) | (0.109) |
| Share of immigrants from other countries x area belonged to Germany until 1945 (yes=1) |  |  |  |  | 0.017 | 0.018 |
|  |  |  |  | (0.047) | (0.047) |
| Constant | 0.263*** | 0.071 | 0.766*** | 0.161 | 4.593*** | 4.628*** |
| (0.042) | (0.110) | (0.157) | (0.138) | (0.756) | (0.757) |
| Number of observations | 328 | 328 | 328 | 328 | 328 | 328 |
| R2 | 0.085 | 0.413 | 0.483 | 0.439 | 0.545 | 0.547 |
| Adjusted R2 | 0.082 | 0.398 | 0.465 | 0.417 | 0.519 | 0.519 |
| *Notes:* As in Table B.1. | | | | | | |

**Table B.4** Differences in start-up rates across Polish counties 2003–2019: The role of historical entrepreneurship in general

|  | I | II | III | IV | V | VI |
| --- | --- | --- | --- | --- | --- | --- |
| Historical self-employment in general (outside agriculture) | 0.252*** | 0.077 | 0.058 | 0.063 | 0.036 | –0.056 |
| (0.033) | (0.057) | (0.056) | (0.059) | (0.057) | (0.067) |
| Area belonged to Germany until 1945  (yes=1) |  | –0.020 | –0.193*** | –1.017*** | –4.128*** | –4.351*** |
|  | (0.037) | (0.060) | (0.320) | (0.911) | (0.908) |
| Area belonged to Russia until 1918  (yes=1) |  | –0.167*** | –0.175*** | –0.164*** | –0.124*** | –0.126*** |
|  | (0.032) | (0.038) | (0.032) | (0.039) | (0.039) |
| Area belonged to Austro-Hungary until 1918 (yes=1) |  | 0.080 | 0.044 | 0.066 | 0.098* | 0.062 |
|  | (0.054) | (0.054) | (0.060) | (0.057) | (0.058) |
| Workforce density |  | –0.015 | –0.005 | –0.021 | 0.0002 | 0.018 |
|  | (0.021) | (0.020) | (0.029) | (0.027) | (0.028) |
| Share of employed in manufacturing |  | 0.184*** | 0.143*** | 0.181*** | 0.142*** | 0.178*** |
|  | (0.036) | (0.035) | (0.039) | (0.038) | (0.041) |
| Distance to the nearest university |  | –0.030** | –0.044*** | –0.041** | –0.044*** | –0.044*** |
|  | (0.015) | (0.014) | (0.016) | (0.015) | (0.015) |
| Distance to the nearest coal field |  | 0.040*** | 0.046*** | 0.034*** | 0.040*** | 0.041*** |
|  | (0.008) | (0.009) | (0.011) | (0.011) | (0.011) |
| Share of indigenous people |  |  | –0.105*** |  | –0.951*** | –0.960*** |
|  |  | (0.021) |  | (0.165) | (0.163) |
| Share of immigrants from Russia |  |  | –0.043* |  | –0.069*** | –0.065*** |
|  |  | (0.022) |  | (0.025) | (0.025) |
| Share of immigrants from other countries |  |  | 0.033* |  | 0.026 | 0.015 |
|  |  | (0.020) |  | (0.023) | (0.023) |
| Historical self-employment in knowledge-intensive industries x area belonged to Germany until 1945 (yes=1) |  |  |  |  |  | 0.309** |
|  |  |  |  |  | (0.123) |
| Workforce density x area belonged to Germany until 1945 (yes=1) |  |  |  |  |  | 0.020 |
|  |  |  |  |  | (0.048) |
| Share of employed in manufacturing x area belonged to Germany until 1945 (yes=1) |  |  |  | –0.081 | –0.133* | –0.208** |
|  |  |  | (0.074) | (0.078) | (0.082) |
| Distance to the nearest university x area belonged to Germany until 1945 (yes=1) |  |  |  | 0.217*** | 0.111* | 0.109* |
|  |  |  | (0.065) | (0.066) | (0.065) |
| Distance to the nearest coal field x area belonged to Germany until 1945 (yes=1) |  |  |  | –0.011 | –0.012 | –0.018 |
|  |  |  | (0.018) | (0.018) | (0.018) |
| Share of indigenous people x area belonged to Germany until 1945 (yes=1) |  |  |  |  | 0.838*** | 0.861*** |
|  |  |  |  | (0.167) | (0.166) |
| Share of immigrants from Russia x area belonged to Germany until 1945 (yes=1) |  |  |  |  | –0.034 | –0.045 |
|  |  |  |  | (0.108) | (0.108) |
| Share of immigrants from other countries x area belonged to Germany until 1945 (yes=1) |  |  |  |  | 0.004 | 0.016 |
|  |  |  |  | (0.047) | (0.047) |
| Constant | 0.031 | 0.013 | 0.697*** | 0.143 | 4.523*** | 4.572*** |
| (0.060) | (0.112) | (0.161) | (0.139) | (0.757) | (0.751) |
| Number of observations | 328 | 328 | 328 | 328 | 328 | 328 |
| R2 | 0.153 | 0.416 | 0.485 | 0.440 | 0.544 | 0.553 |
| Adjusted R2 | 0.150 | 0.401 | 0.467 | 0.418 | 0.517 | 0.525 |
| *Notes:* As in Table B.1. | | | | | | |

**Table B.5** Differences in start-up rates across Polish counties 2012–2019: The role of historical entrepreneurship in knowledge-intensive industries

|  | I | II | III | IV | V | VI |
| --- | --- | --- | --- | --- | --- | --- |
| Historical self-employment in knowledge-intensive industries | 0.138*** | 0.081*** | 0.057** | 0.085*** | 0.074** | 0.089*** |
| (0.014) | (0.030) | (0.029) | (0.030) | (0.029) | (0.033) |
| Area belonged to Germany until 1945  (yes=1) |  | –0.053 | –0.236*** | –1.261*** | –4.954*** | –5.315*** |
|  | (0.039) | (0.060) | (0.337) | (0.961) | (1.020) |
| Area belonged to Russia until 1918  (yes=1) |  | –0.130*** | –0.132*** | –0.129*** | –0.085** | –0.079* |
|  | (0.035) | (0.041) | (0.035) | (0.042) | (0.042) |
| Area belonged to Austro-Hungary until 1918 (yes=1) |  | 0.110** | 0.076 | 0.098 | 0.141** | 0.148*** |
|  | (0.055) | (0.053) | (0.060) | (0.056) | (0.057) |
| Workforce density |  | –0.020 | –0.010 | –0.038 | –0.018 | –0.023 |
|  | (0.022) | (0.021) | (0.029) | (0.027) | (0.027) |
| Share of employed in manufacturing |  | 0.129*** | 0.094*** | 0.104** | 0.056 | 0.043 |
|  | (0.037) | (0.036) | (0.041) | (0.040) | (0.042) |
| Distance to the nearest university |  | –0.042*** | –0.057*** | –0.061*** | –0.064*** | –0.065*** |
|  | (0.015) | (0.015) | (0.017) | (0.016) | (0.016) |
| Distance to the nearest coal field |  | 0.039*** | 0.049*** | 0.032*** | 0.041*** | 0.041*** |
|  | (0.009) | (0.009) | (0.012) | (0.012) | (0.012) |
| Share of indigenous people |  |  | –0.105*** |  | –1.041*** | –1.046*** |
|  |  | (0.022) |  | (0.173) | (0.173) |
| Share of immigrants from Russia |  |  | –0.040* |  | –0.080*** | –0.083*** |
|  |  | (0.024) |  | (0.026) | (0.026) |
| Share of immigrants from other countries |  |  | 0.046** |  | 0.038 | 0.040* |
|  |  | (0.020) |  | (0.023) | (0.024) |
| Historical self-employment in knowledge-intensive industries x area belonged to Germany until 1945 (yes=1) |  |  |  |  |  | –0.077 |
|  |  |  |  |  | (0.073) |
| Workforce density x area belonged to Germany until 1945 (yes=1) |  |  |  | 0.047 | 0.052 | 0.071 |
|  |  |  | (0.047) | (0.047) | (0.050) |
| Share of employed in manufacturing x area belonged to Germany until 1945 (yes=1) |  |  |  | –0.008 | –0.045 | –0.016 |
|  |  |  | (0.078) | (0.082) | (0.086) |
| Distance to the nearest university x area belonged to Germany until 1945 (yes=1) |  |  |  | 0.222*** | 0.138** | 0.139** |
|  |  |  | (0.068) | (0.069) | (0.069) |
| Distance to the nearest coal field x area belonged to Germany until 1945 (yes=1) |  |  |  | –0.007 | –0.007 | –0.004 |
|  |  |  | (0.019) | (0.019) | (0.019) |
| Share of indigenous people x area belonged to Germany until 1945 (yes=1) |  |  |  |  | 0.952*** | 0.949*** |
|  |  |  |  | (0.175) | (0.175) |
| Share of immigrants from Russia x area belonged to Germany until 1945 (yes=1) |  |  |  |  | –0.033 | –0.021 |
|  |  |  |  | (0.114) | (0.114) |
| Share of immigrants from other countries x area belonged to Germany until 1945 (yes=1) |  |  |  |  | 0.027 | 0.028 |
|  |  |  |  | (0.049) | (0.049) |
| Constant | 0.903*** | 0.610*** | 1.178*** | 0.854*** | 5.591*** | 5.710*** |
| (0.039) | (0.188) | (0.205) | (0.224) | (0.823) | (0.831) |
| Number of observations | 328 | 328 | 328 | 328 | 328 | 328 |
| R2 | 0.235 | 0.346 | 0.426 | 0.373 | 0.491 | 0.493 |
| Adjusted R2 | 0.232 | 0.330 | 0.406 | 0.349 | 0.461 | 0.461 |
| *Notes:* The dependent variable is the average start-up rate (log) in 2012–2019. Other notes are given in Table B.1. | | | | | | |
